# Supplementary material for: Intraday Scheduling with Patient Re-entries and Variability in Behaviours
Source: Atypon-hosted journal article supplement (doi:10.1287/msom.2020.0959), 2021-03-10
Supplement: msom.2020.0959.sm1.pdf [file msom.2020.0959.sm1.pdf]

# Online Appendix for *Intraday Scheduling with Patient Re-entries and Variability in Behaviors*

## Appendix A: Proofs and other Technical Results

*Proof of Proposition 3.* Notice that

$$k \log \mathbb{E} \left[ \exp \left( \frac{\sum_{s=0}^t z^{t,s} - C}{k} \right) \right] = k \log \mathbb{E} \left[ \exp \left( \frac{\sum_{s=0}^t z^{t,s}}{k} \right) \right] - C.$$

Therefore, we just need to reformulate  $k \log \mathbb{E} \left[ \exp \left( \frac{\sum_{s=0}^t z^{t,s}}{k} \right) \right]$ . Recall that by Proposition 1, the state variable  $z^{t,s}$  can be written as  $z^{t,s} \sim \text{Bin} \left( z^{t-s,0}, \hat{h}^{t,s} \right)$ . Evaluating its moment generating function and using  $z^{t-s,0} = \sum_{\tau=0}^{t-s} p^{t-s,\tau}$ ,

$$\mathbb{E} \left[ \exp \left( z^{t,s}/k \right) \right] = \exp \left( \sum_{\tau=0}^{t-s} p^{t-s,\tau} \log \left( 1 - \hat{h}^{t,s} + \hat{h}^{t,s} \exp \left( \frac{1}{k} \right) \right) \right).$$

Notice that  $z^{t,s} \sim \text{Bin} \left( z^{t-s,0}, \hat{h}^{t,s} \right)$ , which also indicates that for a fixed time  $t$ , the state variables  $z^{t,s}$  are *independent* across  $s \in \mathcal{T}$ . Thus, the complete reformulation can be written as

$$\begin{aligned} k \log \mathbb{E} \left[ \exp \left( \frac{\sum_{s=0}^t z^{t,s}}{k} \right) \right] &= \sum_{s=0}^t k \log \mathbb{E} \left[ \exp \left( \frac{z^{t,s}}{k} \right) \right] \\ &= k \log \mathbb{E} \left[ \exp \left( \frac{z^{t,0}}{k} \right) \right] + \sum_{s=1}^t k \log \mathbb{E} \left[ \exp \left( \frac{z^{t,s}}{k} \right) \mid z^{t-s,0} \right] \\ &= \sum_{\tau=0}^t p^{t,\tau} + \sum_{s=1}^t k \log \left[ \exp \left( \sum_{\tau=0}^{t-s} p^{t-s,\tau} \log \left( 1 - \hat{h}^{t,s} + \hat{h}^{t,s} \exp \left( \frac{1}{k} \right) \right) \right) \right] = \sum_{s=0}^t \beta^{t,s} \sum_{\tau=0}^{t-s} p^{t-s,\tau} \end{aligned}$$

□

*Proof of Proposition 4.* Recall from (2) that  $y^{t,s} = y^{t-s,0} - \sum_{\tau=0}^{s-1} p^{t-\tau,s-\tau}$ . In addition, for any time  $t$ ,  $y^{t-s,0} = x_{t-s} + \lambda^{t-s}$  are assumed to be independent across  $s$ . As such, we can derive (14):

$$\begin{aligned} &k \log \mathbb{E} \left[ \exp \left( \frac{\sum_{s=0}^t r(s) y^{t,s}}{k} \right) \right] \\ &= k \log \mathbb{E} \left[ \exp \left( \sum_{s=0}^t \frac{r(s)}{k} \left( y^{t-s,0} - \sum_{\tau=0}^{s-1} p^{t-\tau,s-\tau} \right) \right) \right] \\ &= \sum_{s=0}^t k \log \mathbb{E} \left[ \exp \left( \frac{r(s)}{k} y^{t-s,0} \right) \right] - \sum_{s=0}^t k \log \left[ \exp \left( \frac{r(s)}{k} \sum_{\tau=0}^{s-1} p^{t-\tau,s-\tau} \right) \right] \\ &= \sum_{s=0}^t r(s) x_{t-s} + \sum_{s=0}^t k \log \mathbb{E} [\exp(\lambda_{t-s} r(s)/k)] - \sum_{s=0}^t r(s) \sum_{\tau=0}^{s-1} p^{t-\tau,s-\tau} \\ &= \sum_{s=0}^t r(s) \left( x_{t-s} - \sum_{\tau=0}^{s-1} p^{t-\tau,s-\tau} \right) + \sum_{s=0}^t k \log \mathbb{E} [\exp(\lambda_{t-s} r(s)/k)] \end{aligned}$$

□

*Proof of Proposition 5.* The reformulation follows from the fact that  $p^{t,s} - y^{t-1,s-1} = -y^{t,s}$ .

$$\begin{aligned} & k \log \mathbb{E} \left[ \exp \left( \frac{p^{t,s} - y^{t-1,s-1}}{k} \right) \right] \\ &= k \log \mathbb{E} \left[ \exp \left( \frac{\sum_{\tau=0}^{s-1} p^{t-\tau,s-\tau} - y^{t-s,0}}{k} \right) \right] \\ &= \sum_{\tau=0}^{s-1} p^{t-\tau,s-\tau} - x_{t-s} + k \log \mathbb{E} [\exp(-\lambda_{t-s}/k)] \end{aligned}$$

□

*Proof of Proposition 6.* For any patient  $\ell$  that has been in service since time  $t-s$ , by conditioning on  $b_{\ell,t-s}$ , we have  $\mathbb{P}(\mathbb{1}(\text{patient } \ell \text{ stays till time } t) = 1) = \hat{h}_1^{t,s}$ , where

$$\hat{h}_1^{t,s} \triangleq q \prod_{\tau=1}^s (1 - h_1^{t-\tau,s-\tau}) + (1-q) \prod_{\tau=1}^s (1 - h_0^{t-\tau,s-\tau}).$$

Therefore, we can write

$\mathbb{1}(b_{\ell,t-s} = 1, \text{ patient } \ell \text{ stays till time } t) + \mathbb{1}(b_{\ell,t-s} = 0, \text{ patient } \ell \text{ stays till time } t) \sim \text{Bernoulli}(\hat{h}_1^{t,s})$ . Because random variables on different patients are independent, equation (19) is a sum of  $z_1^{t-s,0}$  identical and independent Bernoulli random variables, resulting in  $z_1^{t,s} \sim \text{Bin}(z_1^{t-s,0}, \hat{h}_1^{t,s})$ .

To prove b), first notice that the first consultation service times are *i.i.d.* for all patients requiring X-ray examination. In addition, by definition, we have  $\mathbb{P}(u_\ell^{t-1,s} = 1 | b_{\ell,t-s-1} = 1) = h_1^{t-1,s} \prod_{\tau=1}^s (1 - h_1^{t-1-\tau,s-\tau})$  for all  $t \in [T], s = 0, \dots, t-1, \ell \in [z^{t-s-1}]$ . Therefore,  $\mathbb{P}(b_{\ell,t-s-1} = 1, u_\ell^{t-1,s} = 1) = \bar{h}_1^{t-1,s}$ , which indicates  $\mathbb{1}(b_{\ell,t-s-1} = 1, u_\ell^{t-1,s} = 1) \sim \text{Bernoulli}(\bar{h}_1^{t-1,s})$ . It now follows from independence.

Part c) easily follows from the definition of  $y_3^{t,0}$  and Proposition 1. □

*Proof of Proposition 7.* In the proof of Proposition 4, we have argued that for any time  $t$ , the state variables  $y_1^{t,s}$  are independent for  $s \in \mathcal{T}$ . However, it is not true for  $y_2^{t,s}$  for  $s \in \mathcal{T}$ ; hence, we cannot use the same technique in Proposition 4. Nevertheless, we will show that  $\sum_{s=0}^t r(s) y_2^{t,s}$  can still be evaluated efficiently. By Proposition 6,  $y_2^{t,0} \sim \sum_{s=0}^{t-1} \text{Bin}(z_1^{t-s-1,0}, \bar{h}_1^{t-1,s})$ . Then, for any time  $t$ , the distribution of  $\sum_{s=0}^t y_2^{t-s,0}$  can be written explicitly as

$$\sum_{s=0}^t y_2^{t-s,0} \sim \sum_{s=0}^t \sum_{\tau=0}^{t-s-1} \text{Bin}(z_1^{t-s-\tau-1,0}, \bar{h}_1^{t-s-1,\tau}). \quad (1)$$

We now represent the binomial random variable as a sum of Bernoulli random variables. Let  $L_\ell^{t,s} \sim \text{Bernoulli}(\bar{h}_1^{t,s})$  indicating whether a patient  $\ell$  who has been in service for  $s$  periods at time  $t$  will be routed to X-ray at time  $t+1$ . Then, we rewrite (29) as

$$\sum_{s=0}^t y_2^{t-s,0} = \sum_{s=0}^t \sum_{\tau=0}^{t-s-1} \sum_{\ell=1}^{z_1^{t-s-\tau-1,0}} L_\ell^{t-s-1,\tau} \quad (2)$$

$$= \sum_{\bar{\tau}=0}^{t-1} \sum_{\ell_{\bar{\tau}}=1}^{z_1^{t-\bar{\tau}-1,0}} \left( \sum_{s=0}^{\bar{\tau}} L_{\ell_{\bar{\tau}}}^{t-s-1,\bar{\tau}-s} \right), \quad (3)$$

via a change in the order of summation and letting  $\bar{\tau} = s + \tau$ . The first summation follows because  $s \in \{0, \dots, t-1\}$  and  $\tau \in \{0, \dots, t-s-1\}$ . We do not need to consider the term where  $s = t$  because it equals to zero. The smallest possible value for  $\bar{\tau}$  is 0, which happens when  $s = 0$  and  $\tau = 0$ . Similarly, the largest value for  $\bar{\tau}$  is  $t-1$ , which happens when  $s \in \{0, \dots, t-1\}$  and  $\tau = t-s-1$ . For any  $\bar{\tau} \in \{0, \dots, t-1\}$ , we know  $s$  can take any value in  $\{0, \dots, \bar{\tau}\}$  while  $\tau$  takes value  $\bar{\tau} - s$ . In equation (31), the most inner summations  $\sum_{s=0}^{\bar{\tau}} L_{\ell_{\bar{\tau}}}^{t-s-1, \bar{\tau}-s}$  are independent for all  $\bar{\tau}$  and  $\ell_{\bar{\tau}}$ , because they correspond to some random events of different patients. As such, the following reformulation is valid,

$$\begin{aligned} & k \log \mathbb{E} \left[ \exp \left( \sum_{s=0}^t r(s) y_2^{t,s} / k \right) \right] \\ &= k \log \mathbb{E} \left[ \exp \left( \sum_{s=0}^t r(s) y_2^{t-s,0} / k \right) \right] - \sum_{s=0}^t r(s) \sum_{\tau=0}^{s-1} p_2^{t-\tau, s-\tau} \\ &= \sum_{\bar{\tau}=0}^{t-1} \sum_{\ell_{\bar{\tau}}=1}^{z^{t-\bar{\tau}-1,0}} k \log \mathbb{E} \left[ \exp \left( \sum_{s=0}^{\bar{\tau}} r(s) L_{\ell_{\bar{\tau}}}^{t-s-1, \bar{\tau}-s} / k \right) \right] - \sum_{s=0}^t r(s) \sum_{\tau=0}^{s-1} p_2^{t-\tau, s-\tau} \\ &= \sum_{\bar{\tau}=0}^{t-1} \sum_{\tau=0}^{t-\bar{\tau}-1} p_1^{t-\bar{\tau}-1, \tau} \eta_2^{t, \bar{\tau}} - \sum_{s=0}^t r(s) \sum_{\tau=0}^{s-1} p_2^{t-\tau, s-\tau}, \end{aligned}$$

where equality follows because  $\eta_2$  are constants and  $z^{t-\bar{\tau}-1,0} = \sum_{\tau=0}^{t-\bar{\tau}-1} p_1^{t-\bar{\tau}-1, \tau}$ .  $\eta_2^{t, \bar{\tau}}$  are defined as

$$\eta_2^{t, \bar{\tau}} \triangleq k \log \mathbb{E} \left[ \exp \left( \sum_{s=0}^{\bar{\tau}} r(s) L_{\ell_{\bar{\tau}}}^{t-s-1, \bar{\tau}-s} / k \right) \right], \forall t \in [T], \bar{\tau} = 0, 1, \dots, t-1,$$

which evaluates to give the expression in the statement of the Proposition.  $\square$

*Proof of Proposition 9.* First, state variables  $\mathbf{z}_j$  are independent over  $j = 1, \dots, 3$ . Therefore,

$$k \log \mathbb{E} \left[ \exp \left( \sum_{j=1}^3 \sum_{t=T+1}^{\bar{T}} \sum_{s=1}^t z_j^{t,s} / k \right) \right] = \sum_{j=1}^3 k \log \mathbb{E} \left[ \exp \left( \sum_{t=T+1}^{\bar{T}} \sum_{s=1}^t \text{Bin} \left( z_j^{t-s,0}, \hat{h}_j^{t,s} \right) / k \right) \right].$$

The binomial random variables in two inner summations are dependent. We will use a change of variable to identify the cohorts of different patients. We write

$$\begin{aligned} & \sum_{j=1}^3 k \log \mathbb{E} \left[ \exp \left( \sum_{t=T+1}^{\bar{T}} \sum_{s=1}^t \text{Bin} \left( z_j^{t-s,0}, \hat{h}_j^{t,s} \right) / k \right) \right] \\ &= \sum_{j=1}^3 k \log \mathbb{E} \left[ \exp \left( \sum_{\bar{t}=0}^{\bar{T}} \sum_{t=T+1}^{\bar{T}} \text{Bin} \left( z_j^{\bar{t},0}, \hat{h}_j^{t, \bar{t}+t} \right) / k \right) \right] \\ &= \sum_{j=1}^3 \sum_{\bar{t}=0}^{\bar{T}} k \log \mathbb{E} \left[ \exp \left( \sum_{t=T+1}^{\bar{T}} \text{Bin} \left( z_j^{\bar{t},0}, \hat{h}_j^{t, \bar{t}+t} \right) / k \right) \right], \end{aligned}$$

where the last equation follows from the independence of patients in different cohorts. The most inner summation is a summation of dependent random variables (*e.g.*, this summation cannot be greater than  $z_j^{\bar{t},0}$ ). Then, similar to the proof of Proposition 7, we can write

$$\sum_{t=T+1}^{\bar{T}} \text{Bin} \left( z_j^{\bar{t},0}, \hat{h}_j^{t,\bar{t}+t} \right) = \sum_{\ell_{\bar{t}}=1}^{z_j^{\bar{t},0}} \sum_{t=T+1}^{\bar{T}} \mathbb{1}(\text{patient } \ell_{\bar{t}} \text{ stays until time } t).$$

Then, by the independence of patients

$$\begin{aligned} & \sum_{j=1}^3 \sum_{\bar{t}=0}^T k \log \mathbb{E} \left[ \exp \left( \sum_{t=T+1}^{\bar{T}} \text{Bin} \left( z_j^{\bar{t},0}, \hat{h}_j^{t,\bar{t}+t} \right) / k \right) \right] \\ &= \sum_{j=1}^3 \sum_{\bar{t}=0}^T \sum_{\ell_{\bar{t}}=1}^{z_j^{\bar{t},0}} k \log \mathbb{E} \left[ \exp \left( \sum_{t=T+1}^{\bar{T}} \mathbb{1}(\text{patient } \ell_{\bar{t}} \text{ stays till time } t) / k \right) \right] \\ &= \sum_{j=1}^3 \sum_{\bar{t}=0}^T \sum_{\tau_{\bar{t}}=1}^{\bar{t}} p_j^{\bar{t},\tau} \phi_j^{\bar{t}}, \end{aligned}$$

where we define

$$\begin{aligned} \phi_j^{\bar{t}} &\triangleq k \log \mathbb{E} \left[ \exp \left( \sum_{t=T+1}^{\bar{T}} \mathbb{1}(\text{patient } \ell_{\bar{t}} \text{ stays till time } t) / k \right) \right] \\ &= k \log \left( \sum_{t=T+1}^{\bar{T}} \hat{h}_j^{t,\bar{t}+t} \exp(1/k) \right) \end{aligned}$$

The final reformulation is affine. □

**PROPOSITION 10.** *For any  $t \in [T]$ , the term  $k \log \mathbb{E} \left[ \exp \left( \sum_{s=0}^t z_1^{t,s} / k \right) \right]$  can be reduced to affine constraints in push variables  $\mathbf{p}_1$ . More specifically, we have:*

$$k \log \mathbb{E} \left[ \exp \left( \frac{\sum_{s=0}^t z_1^{t,s}}{k} \right) \right] = \sum_{\tau=0}^t p_1^{t,\tau} + \sum_{s=1}^t k \delta^{t,s} \sum_{\tau=0}^{t-s} p_1^{t-s,\tau}, \quad (4)$$

where constants

$$\delta^{t,s} \triangleq \log \left( 1 - \hat{h}_1^{t,s} + \hat{h}_1^{t,s} \exp \left( \frac{1}{k} \right) \right) \quad \forall t \in [T], s \in [t]$$

can be calculated from primitive data.

*Proof of Proposition 10.* This follows from Proposition 6, and the proof of Proposition 3. □

**PROPOSITION 11.** *For any  $t \in [T]$ ,  $s \in \{0, \dots, t\}$ , the term  $k \log \mathbb{E} \left[ \exp \left( y_2^{t,s} / k \right) \right]$  can be reduced to an affine function in decision variables  $\mathbf{p}_1, \mathbf{p}_2$ . More specifically, we have:*

$$k \log \mathbb{E} \left[ \exp \left( y_2^{t,s} / k \right) \right] = \sum_{\tau=0}^{t-s-1} \delta_2^{t-s-1,\tau} \left( \sum_{\tau_2=0}^{t-s-1-\tau} p_1^{t-s-1-\tau,\tau_2} \right) - \sum_{\tau=0}^{s-1} p_2^{t-\tau,s-\tau} \quad (5)$$

where  $\delta_2^{t,s}$  are constants that can be calculated from data for all  $t \in [T], s = 0, \dots, t$ :

$$\delta_2^{t,s} \triangleq k \log \left( 1 - \bar{h}_1^{t,s} + \bar{h}_1^{t,s} \exp(1/k) \right).$$

*Proof of Proposition 11.* By Proposition 6, we have  $y_2^{t,0} \sim \sum_{s=0}^{t-1} \text{Bin}(z_1^{t-s-1,0}, \bar{h}_1^{t-1,s})$ , where  $\bar{h}_1^{t-1,s} \triangleq qh_1^{t-1,s} \prod_{\tau=1}^s (1 - h_1^{t-1-\tau, s-\tau})$  is as defined in Proposition 6. For simplicity, we define  $\bar{h}_1^{t,0} \triangleq qh_1^{t-1,0}$  for all  $t \in \mathcal{T}$ . For any fixed time  $t$ , the state variables  $z_1^{t,s}$  are independent for  $s \in \mathcal{T}$ . Then,

$$\begin{aligned} & k \log \mathbb{E} \left[ \exp(y_2^{t,s}/k) \right] \\ &= k \log \mathbb{E} \left[ \exp(y_2^{t-s,0}/k) \right] - \sum_{\tau=0}^{s-1} p_2^{t-\tau, s-\tau} \\ &= \sum_{\tau=0}^{t-s-1} k \log \mathbb{E} \left[ \exp(\text{Bin}(z_1^{t-s-1-\tau,0}, \bar{h}_1^{t-s-1,\tau})/k) \right] - \sum_{\tau=0}^{s-1} p_2^{t-\tau, s-\tau} \\ &= \sum_{\tau=0}^{t-s-1} kz^{t-s-1-\tau,0} \log \left( 1 - \bar{h}_1^{t-s-1,\tau} + \bar{h}_1^{t-s-1,\tau} \exp(1/k) \right) - \sum_{\tau=0}^{s-1} p_2^{t-\tau, s-\tau} \\ &= \sum_{\tau=0}^{t-s-1} \delta_2^{t-s-1,\tau} \left( \sum_{\tau_2=0}^{t-s-1-\tau} p_1^{t-s-1-\tau,\tau_2} \right) - \sum_{\tau=0}^{s-1} p_2^{t-\tau, s-\tau}, \end{aligned}$$

where we define the constants  $\delta_2^{t,s} \triangleq k \log \left( 1 - \bar{h}_1^{t,s} + \bar{h}_1^{t,s} \exp(1/k) \right)$  for all  $t \in [T], s = 0, \dots, t$ . The last expression is the final reformulation, and it is affine.  $\square$

**PROPOSITION 12.** For any  $t \in [T]$ , the term  $k \log \mathbb{E} \left[ \exp \left( \sum_{s=0}^t z_2^{t,s}/k \right) \right]$  can be reduced to an affine function in decision variables  $\mathbf{p}_x$ . More specifically, we have:

$$k \log \mathbb{E} \left[ \exp \left( \sum_{s=0}^t z_2^{t,s}/k \right) \right] = \sum_{s=0}^t p_2^{t,s} + \sum_{s=1}^t k \beta_2^{t,s} \sum_{\tau=0}^{t-s} p_2^{t-s,\tau}, \quad (6)$$

where  $\beta_2^{t,s}$  are constants that can be calculated from data for all  $t \in [T], s \in [t]$ :

$$\beta_2^{t,s} \triangleq \log \left( 1 - \hat{h}_2^{t,s} + \hat{h}_2^{t,s} \exp \left( \frac{1}{k} \right) \right).$$

*Proof of Proposition 12.* The result follows from the proof of Proposition 3.  $\square$

**PROPOSITION 13.** For any  $t \in [T], s \in \{0, \dots, t\}$ , the term  $k \log \mathbb{E} \left[ \exp(y_3^{t,s}/k) \right]$  can be reduced to an affine function in decision variables  $\mathbf{p}_2, \mathbf{p}_3$ . More specifically, we have:

$$k \log \mathbb{E} \left[ \exp(y_3^{t,s}/k) \right] = \sum_{\tau=0}^{t-s-1} \delta_3^{t-s-1,\tau} \left( \sum_{\tau_2=0}^{t-s-1-\tau} p_2^{t-s-1-\tau,\tau_2} \right) - \sum_{\tau=0}^{s-1} p_3^{t-\tau, s-\tau}, \quad (7)$$

where  $\delta_3^{t,s}$  are constants for all  $t \in [T], s = 0, \dots, t$ :

$$\delta_3^{t,s} \triangleq k \log \left( 1 - h_2^{t,s} \hat{h}_2^{t,s} + h_2^{t,s} \hat{h}_2^{t,s} \exp(1/k) \right).$$

*Proof of Proposition 13.* This follows from the proof of Proposition 11.

By Proposition 6, we have  $y_3^{t,0} \sim \sum_{s=0}^{t-1} \text{Bin}(z_2^{t-s-1,0}, h_2^{t-1,s} \hat{h}_2^{t-1,s})$ . For simplicity, we define  $\hat{h}_2^{t,0} \triangleq 1$  for all  $t \in \mathcal{T}$ . For any fixed time  $t$ , the state variables  $z_2^{t,s}$  are independent for  $s \in \mathcal{T}$ . Then,

$$\begin{aligned} & k \log \mathbb{E} \left[ \exp \left( y_3^{t,s} / k \right) \right] \\ &= k \log \mathbb{E} \left[ \exp \left( y_3^{t-s,0} / k \right) \right] - \sum_{\tau=0}^{s-1} p_3^{t-\tau, s-\tau} \\ &= \sum_{\tau=0}^{t-s-1} \delta_3^{t-s-1, \tau} \left( \sum_{\tau_2=0}^{t-s-1-\tau} p_2^{t-s-1-\tau, \tau_2} \right) - \sum_{\tau=0}^{s-1} p_3^{t-\tau, s-\tau}, \end{aligned}$$

where we define constants  $\delta_3^{t,s} \triangleq k \log \left( 1 - h_2^{t,s} \hat{h}_2^{t,s} + h_2^{t,s} \hat{h}_2^{t,s} \exp(1/k) \right)$  for all  $t \in [T], s = 0, \dots, t$ . The last expression is the final reformulation, and it is affine.  $\square$

**PROPOSITION 14.** *For any  $t \in [T]$ , the term  $k \log \mathbb{E} \left[ \exp \left( \sum_{s=0}^t r(s) y_3^{t,s} / k \right) \right]$  can be reduced to an affine function in decision variables  $\mathbf{p}, \mathbf{p}_2$ . More specifically, we have:*

$$k \log \mathbb{E} \left[ \exp \left( \sum_{s=0}^t r(s) y_3^{t,s} / k \right) \right] = \sum_{\bar{\tau}=0}^{t-1} \sum_{\tau=0}^{t-\bar{\tau}-1} p_2^{t-\bar{\tau}-1, \tau} \eta_3^{t, \bar{\tau}} - \sum_{s=0}^t r(s) \sum_{\tau=0}^{s-1} p_3^{t-\tau, s-\tau} \quad (8)$$

where  $\eta_3^{t, \bar{\tau}}$  are constants that can be calculated from data:

$$\eta_3^{t, \bar{\tau}} \triangleq k \log \left( 1 + \sum_{s=0}^{\bar{\tau}} h_2^{t-s-1, \bar{\tau}-s} \hat{h}_2^{t-s-1, \bar{\tau}-s} \left( \exp \left( \frac{r(s)}{k} \right) - 1 \right) \right), \quad \forall t \in [T], \bar{\tau} = 0, 1, \dots, t-1.$$

*Proof of Proposition 14.* This follows directly from the proof of Proposition 7.

For any time  $t$ , the distribution of  $\sum_{s=0}^t y_3^{t-s,0}$  can be written as

$$\sum_{s=0}^t y_3^{t-s,0} \sim \sum_{s=0}^t \sum_{\tau=0}^{t-s-1} \text{Bin}(z_2^{t-s-\tau-1,0}, h_2^{t-s-1, \tau} \hat{h}_2^{t-s-1, \tau}). \quad (9)$$

We define the random variable  $M_{\ell}^{t,s} \sim \text{Bernoulli}(h_2^{t,s} \hat{h}_2^{t,s})$ , which indicates whether a patient  $\ell$  who has been in X-ray service for  $s$  periods at time  $t$  will be routed back to the consultation doctor at time  $t+1$ . Then, we rewrite (37) as:

$$\sum_{s=0}^t y_3^{t-s,0} = \sum_{\bar{\tau}=0}^{t-1} z_2^{t-\bar{\tau}-1,0} \left( \sum_{s=0}^{\bar{\tau}} M_{\ell_{\bar{\tau}}}^{t-s-1, \bar{\tau}-s} \right). \quad (10)$$

In equation (38), the most inner summations  $\sum_{s=0}^{\bar{\tau}} M_{\ell_{\bar{\tau}}}^{t-s-1, \bar{\tau}-s}$  are independent for all  $\bar{\tau}$  and  $\ell_{\bar{\tau}}$ , because they correspond to some random events of different patients and different patients are clearly independent. Then,

$$k \log \mathbb{E} \left[ \exp \left( \sum_{s=0}^t r(s) y_3^{t,s} / k \right) \right]$$

$$\begin{aligned}
&= k \log \mathbb{E} \left[ \exp \left( \sum_{s=0}^t r(s) y_3^{t-s,0} / k \right) \right] - \sum_{s=0}^t r(s) \sum_{\tau=0}^{s-1} p_3^{t-\tau, s-\tau} \\
&= \sum_{\bar{\tau}=0}^{t-1} \sum_{\ell_{\bar{\tau}}=1}^{z_2^{t-\bar{\tau}-1,0}} k \log \mathbb{E} \left[ \exp \left( \sum_{s=0}^{\bar{\tau}} r(s) M_{\ell_{\bar{\tau}}}^{t-s-1, \bar{\tau}-s} / k \right) \right] - \sum_{s=0}^t r(s) \sum_{\tau=0}^{s-1} p_3^{t-\tau, s-\tau} \\
&= \sum_{\bar{\tau}=0}^{t-1} \sum_{\tau=0}^{t-\bar{\tau}-1} p_2^{t-\bar{\tau}-1, \tau} \eta_3^{t, \bar{\tau}} - \sum_{s=0}^t r(s) \sum_{\tau=0}^{s-1} p_3^{t-\tau, s-\tau}
\end{aligned}$$

where we define the constants  $\eta_3^{t, \bar{\tau}} \triangleq k \log \mathbb{E} \left[ \exp \left( \sum_{s=0}^{\bar{\tau}} r(s) M_{\ell_{\bar{\tau}}}^{t-s-1, \bar{\tau}-s} / k \right) \right]$  for all  $t \in [T], \bar{\tau} = 0, \dots, t-1$ , which can be calculated and its final expression is as stated in the Proposition.  $\square$

PROPOSITION 15. For any  $t \in \mathcal{T}$ , the term  $k \log \mathbb{E} \left[ \exp \left( \sum_{s=0}^t z_3^{t,s} / k \right) \right]$  can be reduced to an affine function in decision variables  $\mathbf{p}_3$ . More specifically, we have:

$$k \log \mathbb{E} \left[ \exp \left( \sum_{s=0}^t z_3^{t,s} / k \right) \right] = \sum_{s=0}^t p_3^{t,s} + \sum_{s=1}^t k \beta_3^{t,s} \sum_{\tau=0}^{t-s} p_3^{t-s, \tau}, \quad (11)$$

where  $\beta_3^{t,s}$  are constants that can be calculated from data for  $t \in [T], s \in [t]$ :

$$\beta_3^{t,s} \triangleq \log \left( 1 - \hat{h}_3^{t,s} + \hat{h}_3^{t,s} \exp \left( \frac{1}{k} \right) \right).$$

*Proof of Proposition 15.* The proof follows directly from the proof of Proposition 3.  $\square$

## Appendix B: Omitted Result Tables for Experiments 2–5

Table 6 Performance comparison (Experiment 2): varying probability  $\gamma$

|                 |                    | Metrics (mins)      |                    |                            |
|-----------------|--------------------|---------------------|--------------------|----------------------------|
|                 |                    | Total waiting       | Overtime           | Max. instantaneous waiting |
| $\gamma = 0.90$ | Equal-interval     | 168.6 (10.1%)       | 28.3 (10.6%)       | 79.9 (15.1%)               |
|                 | SAA                | 157.6 (2.9%)        | 26.6 (0.4%)        | 72.0 (3.7%)                |
|                 | Ours ( $\pm$ s.d.) | 153.1 ( $\pm$ 0.62) | 26.5 ( $\pm$ 0.11) | 69.4 ( $\pm$ 0.29)         |
| $\gamma = 0.85$ | Equal-interval     | 149.8 (11.5%)       | 25.5 (7.1%)        | 77.8 (14.4%)               |
|                 | SAA                | 139.0 (3.4%)        | 24.0 (0.8%)        | 70.6 (3.8%)                |
|                 | Ours ( $\pm$ s.d.) | 134.4 ( $\pm$ 0.56) | 23.8 ( $\pm$ 0.1)  | 68.0 ( $\pm$ 0.28)         |
| $\gamma = 0.80$ | Equal-interval     | 128.4 (14.2%)       | 22.5 (6.1%)        | 74.8 (14.2%)               |
|                 | SAA                | 118.4 (5.3%)        | 21.3 (0.5%)        | 68.7 (4.9%)                |
|                 | Ours ( $\pm$ s.d.) | 112.4 ( $\pm$ 0.51) | 21.2 ( $\pm$ 0.1)  | 65.5 ( $\pm$ 0.27)         |

**Table 7 Performance comparison (Experiment 3): varying rate  $\alpha$  and probability  $\gamma$** 

|                 |                    | Metrics (mins)         |                      |                            |
|-----------------|--------------------|------------------------|----------------------|----------------------------|
|                 |                    | Total waiting          | Overtime             | Max. instantaneous waiting |
| $\alpha = 0.70$ | Equal-interval     | 149.5 ( <b>12.2%</b> ) | 22.9 ( <b>7.5%</b> ) | 75.3 ( <b>14.8%</b> )      |
| $\gamma = 0.85$ | SAA                | 137.5 ( <b>3.2%</b> )  | 21.5 ( <b>0.9%</b> ) | 68.2 ( <b>4.0%</b> )       |
|                 | Ours ( $\pm$ s.d.) | 133.2 ( $\pm$ 0.58)    | 21.3 ( $\pm$ 0.09)   | 65.6 ( $\pm$ 0.27)         |
| $\alpha = 0.80$ | Equal-interval     | 158.4 ( <b>12.5%</b> ) | 23.7 ( <b>7.7%</b> ) | 79.4 ( <b>15.1%</b> )      |
| $\gamma = 0.85$ | SAA                | 145.5 ( <b>3.3%</b> )  | 22.2 ( <b>0.9%</b> ) | 71.9 ( <b>4.2%</b> )       |
|                 | Ours ( $\pm$ s.d.) | 140.8 ( $\pm$ 0.60)    | 22.0 ( $\pm$ 0.1)    | 69.0 ( $\pm$ 0.28)         |
| $\alpha = 0.85$ | Equal-interval     | 139.0 ( <b>13.5%</b> ) | 21.2 ( <b>7.6%</b> ) | 76.9 ( <b>13.6%</b> )      |
| $\gamma = 0.8$  | SAA                | 127.0 ( <b>3.7%</b> )  | 19.8 ( <b>0.5%</b> ) | 70.2 ( <b>3.7%</b> )       |
|                 | Ours ( $\pm$ s.d.) | 122.5 ( $\pm$ 0.55)    | 19.7 ( $\pm$ 0.09)   | 67.7 ( $\pm$ 0.27)         |

**Table 8 Performance comparison (Experiment 4): varying number of Type A  $n_A$  and X-ray probability  $q$** 

|           |                    | Metrics (mins)         |                       |                            |
|-----------|--------------------|------------------------|-----------------------|----------------------------|
|           |                    | Total waiting          | Overtime              | Max. instantaneous waiting |
| $n_A = 4$ | Equal-interval     | 168.6 ( <b>13.9%</b> ) | 22.3 ( <b>3.2%</b> )  | 66.9 ( <b>20.8%</b> )      |
| $q = 0.7$ | SAA                | 152.2 ( <b>2.8%</b> )  | 21.5 ( <b>-0.5%</b> ) | 57.5 ( <b>3.8%</b> )       |
|           | Ours ( $\pm$ s.d.) | 148.0 ( $\pm$ 0.56)    | 21.6 ( $\pm$ 0.09)    | 55.4 ( $\pm$ 0.23)         |
| $n_A = 4$ | Equal-interval     | 184.1 ( <b>18.6%</b> ) | 23.7 ( <b>4.4%</b> )  | 73.4 ( <b>25.9%</b> )      |
| $q = 0.9$ | SAA                | 166.6 ( <b>7.3%</b> )  | 22.9 ( <b>0.9%</b> )  | 63.3 ( <b>8.6%</b> )       |
|           | Ours ( $\pm$ s.d.) | 155.2 ( $\pm$ 0.57)    | 22.7 ( $\pm$ 0.10)    | 58.3 ( $\pm$ 0.24)         |
| $n_A = 3$ | Equal-interval     | 169.4 ( <b>13.4%</b> ) | 21.7 ( <b>4.8%</b> )  | 66.5 ( <b>19.4%</b> )      |
| $q = 0.9$ | SAA                | 155.5 ( <b>4.1%</b> )  | 21.4 ( <b>3.4%</b> )  | 58.6 ( <b>5.2%</b> )       |
|           | Ours ( $\pm$ s.d.) | 149.4 ( $\pm$ 0.58)    | 20.7 ( $\pm$ 0.09)    | 55.7 ( $\pm$ 0.24)         |
| $n_A = 3$ | Equal-interval     | 175.8 ( <b>15.6%</b> ) | 22.3 ( <b>4.2%</b> )  | 69.0 ( <b>20.4%</b> )      |
| $q = 1.0$ | SAA                | 159.9 ( <b>5.1%</b> )  | 21.6 ( <b>0.9%</b> )  | 60.0 ( <b>4.7%</b> )       |
|           | Ours ( $\pm$ s.d.) | 152.1 ( $\pm$ 0.58)    | 21.4 ( $\pm$ 0.09)    | 57.3 ( $\pm$ 0.25)         |

**Table 9 Performance comparison (Experiment 5): varying maximum earliness  $D$** 

|         |                    | Metrics (mins)         |                       |                            |
|---------|--------------------|------------------------|-----------------------|----------------------------|
|         |                    | Total waiting          | Overtime              | Max. instantaneous waiting |
| $D = 2$ | Equal-interval     | 173.7 ( <b>16.0%</b> ) | 22.1 ( <b>4.2%</b> )  | 67.8 ( <b>22.4%</b> )      |
|         | SAA                | 158.5 ( <b>5.8%</b> )  | 21.2 ( <b>0%</b> )    | 59.5 ( <b>7.4%</b> )       |
|         | Ours ( $\pm$ s.d.) | 149.8 ( $\pm$ 0.58)    | 21.2 ( $\pm$ 0.09)    | 55.4 ( $\pm$ 0.24)         |
| $D = 3$ | Equal-interval     | 172.5 ( <b>14.8%</b> ) | 21.9 ( <b>3.8%</b> )  | 67.2 ( <b>21.1%</b> )      |
|         | SAA                | 158.6 ( <b>5.5%</b> )  | 21.1 ( <b>0%</b> )    | 59.4 ( <b>7.0%</b> )       |
|         | Ours ( $\pm$ s.d.) | 150.3 ( $\pm$ 0.58)    | 21.1 ( $\pm$ 0.09)    | 55.5 ( $\pm$ 0.24)         |
| $D = 5$ | Equal-interval     | 170.2 ( <b>14.6%</b> ) | 21.7 ( <b>1.8%</b> )  | 66.2 ( <b>19.7%</b> )      |
|         | SAA                | 159.1 ( <b>7.1%</b> )  | 21.1 ( <b>-0.9%</b> ) | 59.2 ( <b>7.1%</b> )       |
|         | Ours ( $\pm$ s.d.) | 148.5 ( $\pm$ 0.56)    | 21.3 ( $\pm$ 0.09)    | 55.3 ( $\pm$ 0.24)         |
